# Supplementary material for: Physiological and transcriptomic analyses revealed the change of main flavor substance of Zygosaccharomyces rouxii under salt treatment
Source: Front Nutr. 2022 Aug 24;9:990380. doi: 10.3389/fnut.2022.990380 (PMC9449518; doi:10.3389/fnut.2022.990380)
Supplement: Supplementary Table 2 — Volatile compounds identified in this study. [file Table_2.XLSX]

## Sheet: 0%
0
Serial number	Time/min	Composition	Suitability	CAS#	Content/%
3	1.622	Ethanol	90	64-17-5	23.8895
11	7.234	1-Butanol, 3-methyl-	90	123-51-3	22.8217
62	18.773	Phenylethyl Alcohol	94	1960-12-08	19.0591
25	12.798	1-Hexanol, 2-ethyl-	83	104-76-7	4.9312
6	3.988	1-Propanol, 2-methyl-	97	78-83-1	2.4599
54	17.336	Benzaldehyde, 2,4-dimethyl-	91	15764-16-6	2.4125
43	15.607	Undecanoic acid, 2-methyl-	47	24323-25-9	1.85
55	17.493	Propanoic acid, 2-phenylethyl ester	83	122-70-3	1.7399
82	23.575	Phenol, 2,5-bis(1,1-dimethylethyl)-	94	5875-45-6	1.6812
46	16.272	tert-Butyl-(2-methoxyethoxy)dimethylsilane	40	1000352-09-4	1.3653
28	13.42	N-Benzyl-N-ethyl-p-isopropylbenzamide	47	15089-22-2	1.357
17	10.627	Cyclohexasiloxane, dodecamethyl-	93	540-97-6	1.2425
1	1.325	Ethyl Acetate	80	141-78-6	1.1959
38	15.035	Benzaldehyde, 4-methyl-	97	104-87-0	0.7969
7	4.252	1-Butanol, 3-methyl-, acetate	90	123-92-2	0.6345
44	15.888	Silane, [[4-[1,2-bis[(trimethylsilyl)oxy]ethyl]-1,2-phenylene]bis(oxy)]bis[trimethyl-	38	56114-62-6	0.5951
26	13.133	Benzaldehyde	96	100-52-7	0.5737
33	14.111	Propanoic acid, 2-methyl-	91	79-31-2	0.5393
2	1.476	Butanal, 3-methyl-	90	590-86-3	0.386
60	18.319	Benzyl Alcohol	95	100-51-6	0.3844
29	13.598	2,3-Butanediol	72	513-85-9	0.3617
45	16.164	1-Propanol, 3-(methylthio)-	90	505-10-2	0.355
5	2.68	1-Propanol	72	71-23-8	0.3472
95	27.313	1,2-Benzenedicarboxylic acid, butyl 2-methylpropyl ester	93	17851-53-5	0.3456
23	12.264	Acetic acid	91	64-19-7	0.3332
92	25.817	Phthalic acid, isobutyl octyl ester	90	1000309-04-5	0.309
12	8.795	2-Butanone, 3-hydroxy-	86	513-86-0	0.3001
64	18.978	Methanol, (dimethylsilylene)bis-, diacetate	53	2917-61-5	0.2761
97	28.956	1,4-Benzenediol, 2,5-bis(1,1-dimethylethyl)-	90	88-58-4	0.2591
85	24.045	Diethyl Phthalate	95	84-66-2	0.2341
47	16.358	1-(1-Propen-1-yl)-2-(2-thiopent-3-yl)disulfide	38	1000322-30-2	0.2295
58	18.076	Cyclononasiloxane, octadecamethyl-	87	556-71-8	0.2079
93	26.271	Benzenepropanoic acid, 3,5-bis(1,1-dimethylethyl)-4-hydroxy-, methyl ester	91	6386-38-5	0.2004
90	25.352	Dodecanoic acid	99	143-07-7	0.1985
10	6.775	Cyclopentasiloxane, decamethyl-	94	541-02-6	0.193
98	29.345	n-Hexadecanoic acid	99	1957-10-03	0.1855
9	6.078	2-Heptanone	90	110-43-0	0.1843
39	15.1	Acetophenone	87	98-86-2	0.1823
61	18.389	Acetic acid, chloro-, 2-phenylethyl ester	72	7476-91-7	0.1758
76	21.933	Nonanoic acid	94	112-05-0	0.1677
19	10.94	Nonanal	86	124-19-6	0.1662
88	24.807	Benzoic acid	93	65-85-0	0.1601
42	15.445	2-Furanmethanol	97	98-00-0	0.1596
96	27.416	Tetradecanoic acid	99	544-63-8	0.1587
80	22.873	Hexadecanoic acid, ethyl ester	96	628-97-7	0.1528
63	18.913	1H-Indene, 2,3-dihydro-4-propyl-	32	92013-16-6	0.1472
73	21.144	3',5'-Dimethoxyacetophenone	46	39151-19-4	0.1463
74	21.171	3,4-Dimethylbenzyl alcohol	95	6966-10-05	0.1416
18	10.859	2-Nonanone	64	821-55-6	0.1321
34	14.192	2,3-Butanediol, [R-(R*,R*)]-	72	24347-58-8	0.1271
87	24.553	2H-Pyran-2-one, 6-heptyltetrahydro-	80	713-95-1	0.1259
16	10.497	1,2-Dimethyl-cyclopent-2-enecarboxylic acid	40	1000190-58-1	0.1245
75	21.501	2(3H)-Furanone, 5-hexyldihydro-	90	706-14-9	0.1196
50	16.904	6-Octen-1-ol, 3,7-dimethyl-	97	106-22-9	0.1193
8	5.814	4-Amino-1-butanol	10	13325-10-5	0.1179
37	14.792	3-Methyl-2-buten-1-ol, trimethylsilyl ether	64	1000352-70-5	0.1167
67	19.518	1-Tetradecanol	38	112-72-1	0.1106
30	13.668	Propanoic acid	50	1979-09-04	0.1082
86	24.283	2(3H)-Furanone, dihydro-5-(2-octenyl)-, (Z)-	76	18679-18-0	0.1019
52	17.104	Benzeneacetic acid, ethyl ester	53	101-97-3	0.0943
27	13.274	2-Nonanol	59	628-99-9	0.0937
56	17.99	2,6-Octadien-1-ol, 3,7-dimethyl-	95	624-15-7	0.0931
71	20.502	Undecanoic acid, ethyl ester	89	627-90-7	0.0836
15	10.324	(S)-(+)-3-Methyl-1-pentanol	50	42072-39-9	0.0832
51	17.055	Oxime-, methoxy-phenyl-_	60	1000222-86-6	0.0818
57	18.027	Hexanoic acid	64	142-62-1	0.0796
4	2.475	Propanamide, 2-hydroxy-	46	2043-43-8	0.0792
65	19.183	1,2-Benzisothiazole	81	272-16-2	0.0781
13	9.471	Pyrimidine, 4,6-dimethyl-	56	1558-17-4	0.0744
48	16.58	Ethanone, 1-(2-methylphenyl)-	86	577-16-2	0.0739
72	20.917	Phenol, 4-methyl-	97	106-44-5	0.0738
21	11.837	Pyrazine, 3-ethyl-2,5-dimethyl-	95	13360-65-1	0.073
22	11.912	1-Propene, 3,3-diethoxy-	50	3054-95-3	0.0726
32	13.857	Formic acid, octyl ester	59	112-32-3	0.0724
69	20.01	Phenol	53	108-95-2	0.0717
81	23.121	n-Decanoic acid	62	334-48-5	0.0714
36	14.694	Benzoic acid, methyl ester	93	93-58-3	0.0709
31	13.733	1,6-Octadien-3-ol, 3,7-dimethyl-	46	78-70-6	0.07
70	20.129	2(3H)-Furanone, dihydro-5-pentyl-	93	104-61-0	0.0691
91	25.617	2,4,6-Triamino-5-pyrimidinyl hydrogen sulfate	53	71552-23-3	0.0675
35	14.424	Butanedioic acid, dimethyl ester	47	106-65-0	0.0611
77	22.041	2H-Pyran-2-one, tetrahydro-6-octyl-	41	7370-92-5	0.0611
83	23.727	Barbital	72	57-44-3	0.0611
68	19.853	1H-Indole, 5-methoxy-	20	1006-94-6	0.0603
14	9.703	4-Methyl-2-hexanol	56	2313-61-3	0.0586
24	12.35	4-Octanone, 5-hydroxy-3,6-dimethyl-	37	62759-47-1	0.0586
78	22.446	Hexadecanoic acid, methyl ester	98	112-39-0	0.0537
79	22.549	1,1'-Biphenyl, 2,2',5,5'-tetramethyl-	86	3075-84-1	0.0536
66	19.346	Hexanoic acid, 2-ethyl-	59	149-57-5	0.0522
53	17.169	4-Hexen-1-ol, 5-methyl-2-(1-methylethenyl)-, (R)-	50	498-16-8	0.0517
89	25.061	Benzophenone	93	119-61-9	0.0496
94	26.66	Benzenepropanoic acid	95	501-52-0	0.0469
59	18.217	Propanoic acid, 2-methyl-, 2-ethyl-3-hydroxyhexyl ester	78	74367-31-0	0.0424
49	16.85	Decyl pentafluoropropionate	60	1000351-79-5	0.0407
41	15.402	Chloroacetic acid, nonyl ester	87	5451-96-7	0.0362
84	23.905	Octanal, 2-(phenylmethylene)-	96	101-86-0	0.0339
40	15.37	2-Amino-2-oxo-acetic acid, N-[3,4-dimethylphenyl]-, ethyl ester	32	24451-17-0	0.0306
20	11.081	Pyrazine, trimethyl-	76	14667-55-1	0.0225

## Sheet: 6%
0.06
Serial number	Time/min	Composition	Suitability	CAS#	Content/%
59	18.789	Phenylethyl Alcohol	94	1960-12-08	23.4287
12	7.396	1-Butanol, 3-methyl-	90	123-51-3	23.08
7	3.535	Ethanol	86	64-17-5	20.9464
52	17.509	Acetic acid, 2-phenylethyl ester	83	103-45-7	10.0245
25	12.804	1-Hexanol, 2-ethyl-	83	104-76-7	4.3137
7	3.977	1-Propanol, 2-methyl-	97	78-83-1	2.6326
51	17.336	Benzaldehyde, 2,4-dimethyl-	91	15764-16-6	1.3427
28	13.42	Hexasiloxane, 1,1,3,3,5,5,7,7,9,9,11,11-dodecamethyl-	50	995-82-4	1.0479
44	16.267	1,1,1-Tris(chloromethyl)ethane	50	3922-27-8	0.9119
18	10.632	Cyclohexasiloxane, dodecamethyl-	87	540-97-6	0.8939
58	18.384	Propanoic acid, 2-phenylethyl ester	83	122-70-3	0.8353
43	16.169	1-Propanol, 3-(methylthio)-	87	505-10-2	0.6254
13	8.893	2-Butanone, 3-hydroxy-	86	513-86-0	0.5792
1	1.319	Ethyl Acetate	80	141-78-6	0.5751
76	23.575	Phenol, 2,4-bis(1,1-dimethylethyl)-	96	96-76-4	0.5547
42	15.883	Silane, [[4-[1,2-bis[(trimethylsilyl)oxy]ethyl]-1,2-phenylene]bis(oxy)]bis[trimethyl-	38	56114-62-6	0.545
26	13.139	Benzaldehyde	95	100-52-7	0.4345
57	18.325	Benzyl Alcohol	95	100-51-6	0.3033
41	15.618	Butanoic acid, 2-methyl-	38	116-53-0	0.2853
65	20.691	Octanoic Acid	90	124-07-2	0.2816
9	6.024	Taurolidine	9	19388-87-5	0.2441
88	27.314	1,2-Benzenedicarboxylic acid, butyl 2-methylpropyl ester	93	17851-53-5	0.2367
32	14.122	Propanoic acid, 2-methyl-	91	79-31-2	0.2344
67	21.177	3,4-Dimethylbenzyl alcohol	97	6966-10-05	0.2328
37	15.035	Benzaldehyde, 3-methyl-	95	620-23-5	0.2195
86	25.817	Phthalic acid, isobutyl octyl ester	90	1000309-04-5	0.2029
79	24.04	Diethyl Phthalate	95	84-66-2	0.1959
55	18.071	Cyclononasiloxane, octadecamethyl-	91	556-71-8	0.1939
90	29.35	n-Hexadecanoic acid	98	1957-10-03	0.1702
6	2.675	1-Propanol	72	71-23-8	0.1663
24	12.285	Acetic acid	91	064-19-7	0.1577
11	6.824	Cyclopentasiloxane, decamethyl-	94	541-02-6	0.1571
45	16.353	Ethane, 1-bromo-1,2-diethoxy-	37	1000223-05-5	0.155
81	24.553	2H-Pyran-2-one, tetrahydro-6-octyl-	74	7370-92-5	0.1527
60	18.978	1-Cyclohexyldimethylsilyloxybutane	45	1000281-95-6	0.1495
38	15.1	Acetophenone	87	98-86-2	0.1479
2	1.471	Butanal, 3-methyl-	64	590-86-3	0.136
89	28.956	1,4-Benzenediol, 2,5-bis(1,1-dimethylethyl)-	90	88-58-4	0.133
10	6.17	2-Heptanone	86	110-43-0	0.123
49	17.098	Benzeneacetic acid, ethyl ester	53	101-97-3	0.119
40	15.445	2-Furanmethanol	97	98-00-0	0.1113
19	10.859	2-Nonanone	95	821-55-6	0.1105
74	23.127	n-Decanoic acid	96	334-48-5	0.1049
54	18.033	Hexanoic acid	83	142-62-1	0.1042
8	4.247	1-Butanol, 3-methyl-, acetate	64	123-92-2	0.1033
69	21.939	Nonanoic acid	90	112-05-0	0.1021
20	10.929	Nonanal	83	124-19-6	0.0941
27	13.274	2-Dodecanol	53	10203-28-8	0.0907
35	14.786	tert-Butyldimethylsilanol	53	18173-64-3	0.0853
39	15.397	Nonyl trifluoroacetate	87	1000351-74-3	0.0773
62	19.519	Ethanone, 1-(1H-pyrrol-2-yl)-	58	1072-83-9	0.0769
85	25.623	2,4,6-Triamino-5-pyrimidinyl hydrogen sulfate	53	71552-23-3	0.0732
5	1.951	(1-Hydroxyethylidene)malonic acid diethyl ester	59	31575-84-5	0.0712
92	33.531	1H-Indole-3-ethanol, acetate (ester)	58	13137-14-9	0.0653
15	9.736	2-Heptanol	72	543-49-7	0.0613
63	20.01	Phenol	70	108-95-2	0.0596
66	20.918	Phenol, 4-methyl-	95	106-44-5	0.0587
22	11.853	Pyrazine, 2-ethyl-3,5-dimethyl-	87	13925-07-0	0.058
61	19.184	Benzothiazole	94	95-16-9	0.058
77	23.727	Naphthalene, 1,8-dimethyl-	80	569-41-5	0.0577
84	25.358	Dodecanoic acid	99	143-07-7	0.0564
82	24.861	Benzoic acid	93	65-85-0	0.054
48	16.904	6-Octen-1-ol, 3,7-dimethyl-, (R)-	94	1117-61-9	0.0525
31	13.857	1-Octanol	91	111-87-5	0.0499
46	16.58	Ethanone, 1-(2-methylphenyl)-	42	577-16-2	0.0487
30	13.684	Propanoic acid	81	1979-09-04	0.0472
68	21.393	Benzenethiol, 2-amino-	64	137-07-5	0.0468
16	10.362	1-Hexanol	64	111-27-3	0.0453
23	12.199	1-Heptanol	86	111-70-6	0.0448
34	14.695	Benzoic acid, methyl ester	90	93-58-3	0.0444
87	26.271	Benzenepropanoic acid, 3,5-bis(1,1-dimethylethyl)-4-hydroxy-, methyl ester	94	6386-38-5	0.0442
17	10.503	2-Furancarboxylic acid, ethyl ester	47	614-99-3	0.0439
47	16.85	Benzene, 1-ethyl-3,5-dimethyl-	38	934-74-7	0.043
21	11.108	Pyrazine, trimethyl-	87	14667-55-1	0.0417
53	17.984	2,6-Octadien-1-ol, 3,7-dimethyl-, (E)-	96	106-24-1	0.0412
70	22.263	n-Hexyl salicylate	94	6259-76-3	0.0402
80	24.229	Cyclotetradecane	97	295-17-0	0.0394
29	13.603	Benzaldehyde, 2,5-bis[(trimethylsilyl)oxy]-	59	56114-69-3	0.0383
72	22.608	2-Phenylpyrimidine	83	7431-45-0	0.0371
36	14.878	Sulfide, allyl methyl	78	10152-76-8	0.0366
73	22.873	Hexadecanoic acid, ethyl ester	98	628-97-7	0.0365
14	9.519	Pyrazine, 2,5-dimethyl-	83	123-32-0	0.0343
83	25.066	Benzophenone	91	119-61-9	0.0337
64	20.129	2(3H)-Furanone, dihydro-5-pentyl-	59	104-61-0	0.0328
71	22.446	Hexadecanoic acid, methyl ester	98	112-39-0	0.0319
56	18.211	Butanoic acid, butyl ester	64	109-21-7	0.0297
75	23.257	Phenol, p-tert-butyl-	93	98-54-4	0.0284
78	23.905	Octanal, 2-(phenylmethylene)-	98	101-86-0	0.0258
50	17.169	6-Octen-1-ol, 7-methyl-3-methylene-	43	13066-51-8	0.0247
91	29.528	3-Amino-3-p-tolyl-propionic acid ethyl ester	43	94104-32-2	0.02
33	14.43	Butanedioic acid, dimethyl ester	59	106-65-0	0.0137

## Sheet: 12%
0.12
Serial number	Time/min	Composition	Suitability	CAS#	Content/%
111	37.773	Phenylethyl Alcohol	94	1960-12-08	31.6414
9	7.499	1-Butanol, 3-methyl-	90	123-51-3	22.2338
3	1.643	Ethanol	86	64-17-5	21.8684
48	17.493	Acetic acid, 2-phenylethyl ester	83	103-45-7	5.9206
6	3.982	1-Propanol, 2-methyl-	97	78-83-1	2.4386
24	13.133	Benzaldehyde	95	100-52-7	1.7369
23	12.782	1-Hexanol, 2-ethyl-	83	104-76-7	1.4105
47	17.325	Benzaldehyde, 2,4-dimethyl-	91	15764-16-6	1.2673
41	16.175	1-Propanol, 3-(methylthio)-	93	505-10-2	0.9405
11	8.995	2-Butanone, 3-hydroxy-	78	513-86-0	0.9142
26	13.42	Pentasiloxane, dodecamethyl-	43	141-63-9	0.7756
82	24.04	Diethyl Phthalate	96	84-66-2	0.6769
42	16.256	tert-Butyl-(2-methoxyethoxy)dimethylsilane	33	1000352-09-4	0.4408
14	10.627	Cyclohexasiloxane, dodecamethyl-	91	540-97-6	0.4213
40	15.883	Benzeneacetic acid, .alpha.,3,4-tris[(trimethylsilyl)oxy]-, trimethylsilyl ester	43	37148-65-5	0.4073
1	1.319	Ethyl Acetate	72	141-78-6	0.3329
65	21.177	3,4-Dimethylbenzyl alcohol	97	6966-10-05	0.3034
7	6.008	Propanedioic acid, oxo-, diethyl ester	9	609-09-6	0.2627
53	18.325	Benzyl Alcohol	97	100-51-6	0.2596
39	15.624	Methyl-2-O-methyl.beta.l-arabinopyranoside	38	7381-11-05	0.2482
91	27.313	1,2-Benzenedicarboxylic acid, butyl 2-methylpropyl ester	93	17851-53-5	0.2308
35	15.029	Benzaldehyde, 4-methyl-	76	104-87-0	0.2166
90	25.817	Phthalic acid, isobutyl octyl ester	90	1000309-04-5	0.1996
30	14.127	Propanoic acid, 2-methyl-	91	79-31-2	0.1729
5	2.67	1-Propanol	80	71-23-8	0.1696
36	15.094	Acetophenone	87	98-86-2	0.1559
21	12.307	Acetic acid	87	064-19-7	0.1493
62	20.691	Octanoic Acid	86	124-07-2	0.145
93	28.956	1,4-Benzenediol, 2,5-bis(1,1-dimethylethyl)-	91	88-58-4	0.1298
79	23.575	Phenol, 2,4-bis(1,1-dimethylethyl)-	93	96-76-4	0.1288
38	15.451	2-Furanmethanol	95	98-00-0	0.1285
54	18.368	2-Furancarboxylic acid, 2-phenylethyl ester	78	7149-32-8	0.1284
15	10.886	Nonanal	90	124-19-6	0.1151
46	17.077	2-Phehylethylamine, N,N-di(trifluoroacetyl)-	43	1000328-32-5	0.1148
8	6.775	Cyclopentasiloxane, decamethyl-	91	541-02-6	0.1103
67	21.939	Nonanoic acid	81	112-05-0	0.1077
80	23.727	Barbital	64	57-44-3	0.1064
89	25.623	2,4,6-Triamino-5-pyrimidinyl hydrogen sulfate	53	71552-23-3	0.104
58	19.513	Ethanone, 1-(1H-pyrrol-2-yl)-	90	1072-83-9	0.1031
50	18.071	Cyclononasiloxane, octadecamethyl-	91	556-71-8	0.0998
57	19.184	Benzothiazole	94	95-16-9	0.0997
2	1.47	Pentanal	47	110-62-3	0.0933
4	1.951	(1-Hydroxyethylidene)malonic acid diethyl ester	64	31575-84-5	0.0916
96	33.531	1H-Indole-3-ethanol, acetate (ester)	74	13137-14-9	0.0803
63	20.923	Phenol, 4-methyl-	93	106-44-5	0.0764
43	16.342	3,5-Dihydroxybenzaldehyde	38	26153-38-8	0.0757
66	21.398	Thiazole, 5-ethenyl-4-methyl-	62	1759-28-0	0.0723
59	20.01	Phenol	76	108-95-2	0.0717
73	22.608	2-Phenylpyrimidine	70	7431-45-0	0.0708
17	11.561	2-Cyclopenten-1-one, 2,3,4,5-tetramethyl-	55	54458-61-6	0.0707
94	29.35	n-Hexadecanoic acid	98	1957-10-03	0.0697
69	22.263	n-Hexyl salicylate	94	6259-76-3	0.0675
51	18.103	Phenol, 2-methoxy-	93	1990-05-01	0.0634
33	14.781	tert-Butyldimethylsilanol	53	18173-64-3	0.063
140	44.59	1,1'-Biphenyl, 2,2',5,5'-tetramethyl-	93	3075-84-1	0.11
60	20.129	2(3H)-Furanone, dihydro-5-pentyl-	92	104-61-0	0.0579
52	18.276	Propanoic acid, 2-methyl-, 1-(1,1-dimethylethyl)-2-methyl-1,3-propanediyl ester	78	74381-40-1	0.0557
18	11.848	Pyrazine, 3-ethyl-2,5-dimethyl-	90	13360-65-1	0.0541
84	24.558	4-Quinolinecarboxaldehyde	83	4363-93-3	0.052
29	13.852	1-Octanol	91	111-87-5	0.0507
49	18.038	Hexanoic acid	72	142-62-1	0.0506
37	15.386	Cyclooctane, methyl-	70	1502-38-1	0.0504
32	14.43	Hexadecane	90	544-76-3	0.0502
81	23.905	Octanal, 2-(phenylmethylene)-	99	101-86-0	0.0484
78	23.402	4-Azabenzimidazole	72	273-21-2	0.0483
71	22.446	Hexadecanoic acid, methyl ester	99	112-39-0	0.0475
10	8.779	Octanal	83	124-13-0	0.0474
44	16.401	Benzaldehyde, 2,5-dimethyl-	64	5779-94-2	0.0436
31	14.208	2,3-Butanediol	86	513-85-9	0.0429
74	23.127	n-Decanoic acid	50	334-48-5	0.0418
83	24.283	Tonalid	98	21145-77-7	0.0406
12	9.541	Pyrazine, 2,5-dimethyl-	87	123-32-0	0.0397
27	13.592	Benzeneethanamine, N-butyl-.beta.,4-bis[(trimethylsilyl)oxy]-	50	40629-66-1	0.0397
86	24.856	Benzoic acid	90	65-85-0	0.039
20	12.193	1-Heptanol	86	111-70-6	0.0389
28	13.69	Propanoic acid	83	1979-09-04	0.0387
76	23.257	Phenol, p-tert-butyl-	70	98-54-4	0.0377
13	10.373	1-Hexanol	72	111-27-3	0.0372
70	22.36	Azulene, 1,4-dimethyl-7-(1-methylethyl)-	93	489-84-9	0.0365
75	23.17	Naphthalene, 1,2,3-trimethyl-4-propenyl-, (E)-	74	26137-53-1	0.0357
34	14.873	Sulfide, allyl methyl	55	10152-76-8	0.0334
45	16.834	Benzene, 1-ethyl-2,3-dimethyl-	35	933-98-2	0.0321
87	25.066	Benzophenone	95	119-61-9	0.0315
88	25.358	Dodecanoic acid	99	143-07-7	0.0314
25	13.252	Iminostilbene	38	256-96-2	0.0309
19	11.939	Cyclobutanone, oxime	35	2972-05-06	0.0301
61	20.415	Benzenepropanol	49	122-97-4	0.0295
16	11.118	Pyrazine, trimethyl-	87	14667-55-1	0.0283
22	12.453	7-Octen-2-ol, 2,6-dimethyl-	59	18479-58-8	0.0244
92	27.702	7,9-Di-tert-butyl-1-oxaspiro(4,5)deca-6,9-diene-2,8-dione	99	82304-66-3	0.0238
64	21.009	p-(2-Acetoxyethoxy)toluene	47	06807-11-0	0.022
77	23.359	5-Thiazoleethanol, 4-methyl-	93	137-00-8	0.0215
95	29.534	Tyramine, N-formyl-	64	13062-78-7	0.0215
85	24.791	Indole	95	120-72-9	0.0208

## Sheet: 18%
0.18
Serial number	Time/min	Composition	Suitability	CAS#	Content/%
125	37.703	Phenylethyl Alcohol	94	1960-12-08	30.911
11	7.278	1-Butanol, 3-methyl-	90	123-51-3	28.4955
3	1.611	Ethanol	90	64-17-5	17.4216
6	3.977	1-Propanol, 2-methyl-	97	78-83-1	2.4145
58	17.498	Acetic acid, 2-phenylethyl ester	83	103-45-7	2.408
33	13.144	Benzaldehyde	95	100-52-7	1.4167
49	16.169	1-Propanol, 3-(methylthio)-	94	505-10-2	1.3754
30	12.788	1-Hexanol, 2-ethyl-	90	104-76-7	1.3
19	10.627	Cyclohexasiloxane, dodecamethyl-	91	540-97-6	1.1491
35	13.425	Hexasiloxane, 1,1,3,3,5,5,7,7,9,9,11,11-dodecamethyl-	50	995-82-4	0.9324
56	17.336	Benzaldehyde, 2-ethyl-	91	22927-13-5	0.8711
13	8.801	2-Butanone, 3-hydroxy-	78	513-86-0	0.7311
43	15.04	5-Methylenebicyclo 6-3.2.0]hept-3-en-2-one	25	1000211-11-9	0.5346
43	21.989	Nonanal	90	124-19-6	0.4962
85	24.04	Diethyl Phthalate	95	84-66-2	0.4491
48	15.888	Silane, [[4-[1,2-bis[(trimethylsilyl)oxy]ethyl]-1,2-phenylene]bis(oxy)]bis[trimethyl-	41	56114-62-6	0.4269
47	15.618	Undecanoic acid, 2-methyl-	47	24323-25-9	0.4049
1	1.325	Ethyl Acetate	72	141-78-6	0.3998
50	16.277	Ethyl(dimethyl)methoxysilane	33	52686-75-6	0.3919
61	18.325	Benzyl Alcohol	96	100-51-6	0.3586
72	21.177	3,4-Dimethylbenzyl alcohol	97	6966-10-05	0.3451
74	21.939	Nonanoic acid	95	112-05-0	0.2801
14	8.844	Octanal	90	124-13-0	0.2699
8	6.197	Heptanal	96	111-71-7	0.266
7	5.938	Ethylene oxide	3	75-21-8	0.2573
37	13.863	1-Octanol	91	111-87-5	0.2489
76	28.163	2-Octenal, (E)-	83	2548-87-0	0.4617
46	15.445	2-Furanmethanol	95	98-00-0	0.2353
38	14.122	Propanoic acid, 2-methyl-	91	79-31-2	0.2158
19	14.526	Cyclopentasiloxane, decamethyl-	94	541-02-6	0.2488
34	13.371	2-Nonenal, (Z)-	93	60784-31-8	0.1975
59	18.071	Cyclononasiloxane, octadecamethyl-	87	556-71-8	0.1655
44	15.105	Acetophenone	87	98-86-2	0.1626
4	2.659	Acetic acid, ethoxy-	23	627-03-2	0.1619
91	27.314	1,2-Benzenedicarboxylic acid, butyl 2-methylpropyl ester	93	17851-53-5	0.1594
27	12.194	1-Heptanol	90	111-70-6	0.1402
51	16.364	2-Oxo-1-methyl-3-isopropylpyrazine	43	78210-68-1	0.1393
90	25.817	Phthalic acid, isobutyl octyl ester	90	1000309-04-5	0.1333
41	14.489	Hexadecane	50	544-76-3	0.1323
45	15.402	1-Decene	86	872-05-9	0.1266
89	25.623	Aminomethanesulfonic acid	59	13881-91-9	0.1253
83	23.727	Barbital	64	57-44-3	0.1207
67	19.513	Ethanone, 1-(1H-pyrrol-2-yl)-	90	1072-83-9	0.1187
40	14.43	Butanedioic acid, dimethyl ester	72	106-65-0	0.1161
60	18.103	Phenol, 2-methoxy-	95	1990-05-01	0.1121
70	20.696	Octanoic acid, silver(1+) salt	78	24927-67-1	0.1101
12	7.461	Furan, 2-pentyl-	83	3777-69-3	0.1077
68	20.01	Phenol	81	108-95-2	0.1074
2	1.476	Pentanal	76	110-62-3	0.1069
39	14.192	2-Hexanol, 5-methyl-	64	627-59-8	0.0998
28	12.28	Acetic acid	87	64-19-7	0.0991
5	3.34	Hexanal	80	66-25-1	0.0972
18	10.341	1-Hexanol	78	111-27-3	0.0964
71	20.918	Phenol, 4-methyl-	96	106-44-5	0.0926
55	17.093	4-Butylbenzoic acid, 2-phenylethyl ester	47	1000293-52-9	0.0878
54	16.85	1-Dodecanol	87	112-53-8	0.0812
82	23.575	Phenol, 2,4-bis(1,1-dimethylethyl)-	96	96-76-4	0.0765
79	23.127	n-Decanoic acid	96	334-48-5	0.0764
86	24.272	Tonalid	43	21145-77-7	0.0756
94	33.531	1H-Indole-3-ethanol, acetate (ester)	50	13137-14-9	0.0729
16	9.482	Pyrazine, 2,6-dimethyl-	80	108-50-9	0.0721
15	9.179	cis-2-(2-Pentenyl)furan	95	70424-13-4	0.0701
23	11.081	Pyrazine, trimethyl-	87	14667-55-1	0.0693
75	22.263	n-Hexyl salicylate	94	6259-76-3	0.0685
69	20.129	2(3H)-Furanone, dihydro-5-pentyl-	92	104-61-0	0.0676
64	18.973	7-Ethylidenebicyclo[4.2.1]nona-2,4-diene	50	94400-10-9	0.0649
92	28.972	1,4-Benzenediol, 2,5-bis(1,1-dimethylethyl)-	81	88-58-4	0.064
42	14.797	3-Methyl-2-buten-1-ol, 4-trimethylsilyl ether	64	1000352-70-5	0.0635
73	21.398	2,4-Diamino-6-methyl-1,3,5-triazine	52	542-02-9	0.0626
25	11.842	Pyrazine, 3-ethyl-2,5-dimethyl-	93	13360-65-1	0.0587
93	29.356	n-Hexadecanoic acid	95	1957-10-03	0.0584
88	24.872	Benzoic acid	94	65-85-0	0.0569
31	12.863	Hexatriacontane	38	630-06-8	0.0566
66	19.389	Heptanoic acid	25	111-14-8	0.0541
87	24.559	4-Quinolinecarboxaldehyde	96	4363-93-3	0.0527
78	22.717	Ethanol, 2-(dodecyloxy)-	80	4536-30-5	0.0511
77	22.608	2-Phenylpyrimidine	91	7431-45-0	0.0492
84	23.905	Octanal, 2-(phenylmethylene)-	99	101-86-0	0.049
57	17.406	2,4-Decadienal, (E,E)-	91	25152-84-5	0.0484
65	19.184	Benzothiazole	90	95-16-9	0.0479
36	13.679	Propanoic acid	83	1979-09-04	0.0457
76	22.36	Naphthalene, 1,6-dimethyl-4-(1-methylethyl)-	94	483-78-3	0.0452
32	12.934	Ethanone, 1-(2-furanyl)-	72	1192-62-7	0.0416
17	9.52	Cyclopentane, 1-ethyl-2-methyl-	50	3726-46-3	0.036
26	11.918	1-Propene, 3,3-diethoxy-	50	3054-95-3	0.0358
20	10.848	Pyrazine, 2-ethyl-5-methyl-	60	13360-64-0	0.034
53	16.807	Formamide, N,N-dibutyl-	81	761-65-9	0.0339
80	23.257	Phenol, p-tert-butyl-	64	98-54-4	0.0336
81	23.354	5-Thiazoleethanol, 4-methyl-	94	137-00-8	0.0331
29	12.69	2,4-Heptadienal, (E,E)-	93	4313-03-05	0.0286

## Sheet: Common shared
Volatiles	0	0.06	0.12	0.18
Ethanol	23.8895	20.9464	21.8684	17.4216
1-Butanol, 3-methyl-	22.8217	23.08	22.2338	28.4955
Phenylethyl Alcohol	19.0591	23.4287	31.6414	30.911
1-Hexanol, 2-ethyl-	4.9312	4.3137	1.4105	1.3
1-Propanol, 2-methyl-	2.4599	2.6326	2.4386	2.4145
Cyclohexasiloxane, dodecamethyl-	1.2425	0.8939	0.4213	1.1491
Ethyl Acetate	1.1959	0.5751	0.3329	0.3998
Benzaldehyde	0.5737	0.4345	1.7369	1.4167
Propanoic acid, 2-methyl-	0.5393	0.2344	0.1729	0.2158
Benzyl Alcohol	0.3844	0.3033	0.2596	0.3586
1-Propanol, 3-(methylthio)-	0.355	0.6254	0.9405	1.3754
1,2-Benzenedicarboxylic acid, butyl 2-methylpropyl ester	0.3456	0.2367	0.2308	0.1594
Acetic acid	0.3332	0.1577	0.1493	0.0991
Phthalic acid, isobutyl octyl ester	0.309	0.2029	0.1996	0.1333
2-Butanone, 3-hydroxy-	0.3001	0.5792	0.9142	0.7311
1,4-Benzenediol, 2,5-bis(1,1-dimethylethyl)-	0.2591	0.133	0.1298	0.064
Diethyl Phthalate	0.2341	0.1959	0.6769	0.4491
Cyclononasiloxane, octadecamethyl-	0.2079	0.1939	0.0998	0.1655
Cyclopentasiloxane, decamethyl-	0.193	0.1571	0.1103	0.2488
n-Hexadecanoic acid	0.1855	0.1702	0.0697	0.0584
Acetophenone	0.1823	0.1479	0.1559	0.1626
Nonanoic acid	0.1677	0.1479	0.1077	0.2801
Nonanal	0.1662	0.0941	0.1151	0.4962
Benzoic acid	0.1601	0.054	0.039	0.0569
2-Furanmethanol	0.1596	0.1113	0.1285	0.2353
3,4-Dimethylbenzyl alcohol	0.1416	0.2328	0.3034	0.3451
Propanoic acid	0.1082	0.0472	0.0387	0.0457
Phenol, 4-methyl-	0.0738	0.0587	0.0764	0.0926
Phenol	0.0717	0.0596	0.0717	0.1074
n-Decanoic acid	0.0714	0.1049	0.0418	0.0764
2(3H)-Furanone, dihydro-5-pentyl-	0.0691	0.0328	0.0579	0.0676
Octanal, 2-(phenylmethylene)-	0.0339	0.0258	0.0484	0.049
Pyrazine, trimethyl-	0.0225	0.0417	0.0283	0.0693
Total	81.2478	80.6533	87.25	89.6509
